1 The cluster transfer function of AtNEET supports the ferredoxin-  
2 thioredoxin network of plant cells

3

4 Sara I. Zandalinas<sup>1,4</sup>, Luhua Song<sup>2</sup>, Rachel Nechushtai<sup>3</sup>, David G Mendoza-Cozatl<sup>4</sup> and Ron  
5 Mittler<sup>4,5,\*</sup>

6

7 <sup>1</sup>Department of Biology, Biochemistry and Environmental Sciences. University Jaume I. Av. de  
8 Vicent Sos Baynat, s/n, Castelló de la Plana, 12071, Spain.

9 <sup>2</sup>Department of Biological Sciences, University of North Texas, Denton, TX 76203, USA.

10 <sup>3</sup>The Alexander Silberman Institute of Life Science, The Hebrew University of Jerusalem, Edmond  
11 J. Safra Campus at Givat Ram, Jerusalem 91904, Israel.

12 <sup>4</sup>Division of Plant Sciences and Technology, College of Agriculture Food and Natural Resources  
13 and Interdisciplinary Plant Group. Christopher S. Bond Life Sciences Center University of  
14 Missouri. 1201 Rollins St, Columbia, MO 65211, USA.

15 <sup>5</sup>Department of Surgery, University of Missouri School of Medicine, Christopher S. Bond Life  
16 Sciences Center University of Missouri. 1201 Rollins St, Columbia, MO 65211, USA.

17 **\*Corresponding author:** Ron Mittler ([mittlerr@missouri.edu](mailto:mittlerr@missouri.edu)).

18

19 **Email addresses:** [sizquier@uji.es](mailto:sizquier@uji.es) (SIZ); [luhuas2010@gmail.com](mailto:luhuas2010@gmail.com) (LS); [rachel@mail.huji.ac.il](mailto:rachel@mail.huji.ac.il)  
20 (RN); [mendezad@missouri.edu](mailto:mendezad@missouri.edu) (DGM-C); [mittlerr@missouri.edu](mailto:mittlerr@missouri.edu) (RM).

21 **Date of submission:**

22 **Number of Tables and Figures:** 0 Tables, 9 Figures.

23 **Number of Supplementary Tables and Figures:** 2 Supplementary Tables, 4 Supplementary  
24 Figures.

25 **Word count:** 5,302

26 **Running Title:** AtNEET supports the Fd:FTR:TRX network.

27 **ABSTRACT**

28 NEET proteins are conserved 2Fe-2S proteins that regulate the levels of iron and reactive oxygen  
29 species in plant and mammalian cells. Previous studies of seedlings with constitutive expression  
30 of AtNEET, or its dominant-negative variant H89C (impaired in 2Fe-2S cluster transfer), revealed  
31 that disrupting AtNEET function causes oxidative stress, chloroplast iron overload, activation of  
32 iron-deficiency responses, and cell death. Because disrupting AtNEET function is deleterious to  
33 plants, we developed an inducible expression system to study AtNEET function in mature plants  
34 using a time-course proteomics approach. Here, we report that suppression of AtNEET cluster  
35 transfer function results in drastic changes in the expression of different members of the ferredoxin  
36 (Fd), Fd-thioredoxin (TRX) reductase (FTR), and TRX network of Arabidopsis, as well as in  
37 cytosolic cluster assembly proteins. In addition, the expression of Yellow Stripe-Like 6 (YSL6),  
38 involved in iron export from chloroplasts was elevated. Taken together, our findings reveal new  
39 roles for AtNEET in supporting the Fd-FTR-TRX network of plants, iron mobilization from the  
40 chloroplast, and cytosolic 2Fe-2S cluster assembly. In addition, we show that AtNEET function is  
41 linked to the expression of glutathione peroxidases (GPXs) which play a key role in the regulation  
42 of ferroptosis and redox balance in different organisms.

43

44 **Highlight:** Using proteomics analysis and an inducible expression system, the iron-sulfur cluster  
45 transfer function of AtNEET was found to support the ferredoxin-thioredoxin network of  
46 Arabidopsis.

47

48 **Key Words:** Arabidopsis, Chloroplast, Inducible expression, Iron-Sulfur, NEET, Proteomics,  
49 ROS, Thioredoxin.

50 **Abbreviations:** CIA, cytosolic iron-sulfur cluster assembly; CISD, CDGSH Iron-Sulfur Domain;  
51 DEX, dexamethasone; Fd, ferredoxin; FTR, ferredoxin:thioredoxin reductase; GSH, glutathione;;  
52 GPX, glutathione peroxidase; GR, glutathione reductase; MDAR, monodehydroascorbate  
53 reductase; MS, mass spectrometry; ROS, reactive oxygen species; TRX, thioredoxin; TXNIP,  
54 thioredoxin interacting protein.

## 55 INTRODUCTION

56 NEET or CISD (CDGSH Iron-Sulfur Domain) proteins are conserved proteins found in  
57 mammalian, plants, fungi, and bacteria (Nechushtai *et al.*, 2012, 2020; Inupakutika *et al.*, 2017;  
58 Sengupta *et al.*, 2018). They contain the CDGSH (C-X-C-X2-(S/T)-X3-P-X-C-D-G-(S/A/T)-H)  
59 2Fe-2S cluster binding domain and can participate in different cluster and/or electron transfer  
60 reactions (Sengupta *et al.*, 2018; Mittler *et al.*, 2019; Nechushtai *et al.*, 2020). While human cells  
61 contain three different NEET proteins (mitoNEET, NAF-1, and MiNT, encoded by CISD1-3,  
62 respectively), plants contain only one member of the NEET family, known in Arabidopsis as  
63 AtNEET (encoded by AT5G51720; Nechushtai *et al.*, 2012). AtNEET structure mostly resembles  
64 that of mammalian NAF-1 and mitoNEET, and all three proteins function as homodimers anchored  
65 to a membrane. In the case of NAF-1 this membrane is the outer endoplasmic reticulum (ER),  
66 mitochondria, or the mitochondrial-associated membranes that connect these two organelles, while  
67 in the case of mitoNEET and AtNEET it is primarily the outer mitochondria and chloroplast,  
68 respectively (Nechushtai *et al.*, 2020). Among the most conserved functions of NEET proteins in  
69 different organisms is the regulation of iron and reactive oxygen species (ROS) homeostasis in  
70 mitochondria of mammalian cells (Sohn *et al.*, 2013), or in chloroplasts of plants (Zandalinas *et*  
71 *al.*, 2020*b*). Suppression of NAF-1 or AtNEET protein levels was found to result in an enhanced  
72 accumulation of iron and ROS in the mitochondria or chloroplasts respectively, and this effect was  
73 linked to the ability of NAF-1 or AtNEET to bind and release their 2Fe-2S clusters (Darash-  
74 Yahana *et al.*, 2016; Mittler *et al.*, 2019; Zandalinas *et al.*, 2020*b*). Of particular importance to our  
75 understanding of NEET function in different biological systems are two studies in which a mutated  
76 copy of NAF-1 or AtNEET with a high 2Fe-2S cluster stability (H114C of NAF-1, or H89C of  
77 AtNEET) was constitutively expressed in wild type cells to block NEET protein cluster transfer  
78 function (Darash-Yahana *et al.*, 2016; Zandalinas *et al.*, 2020*b*). By forming heterodimers with the  
79 native NEET protein, or complete mutant dimers, the mutated NEET copies functioned as  
80 dominant-negative inhibitors of NEET protein function, blocking their different cluster transfer  
81 reactions (Darash-Yahana *et al.*, 2016; Zandalinas *et al.*, 2020*b*). As indicated above, this  
82 inhibition resulted in enhanced iron and ROS accumulation in the mitochondria or chloroplast, that  
83 subsequently caused plant and animal cell death (Darash-Yahana *et al.*, 2016; Zandalinas *et al.*,  
84 2020*b*). Paradoxically, the constitutive expression of H89C in Arabidopsis was associated with the  
85 activation of iron deficiency responses in leaves of plants that accumulated high levels of iron

86 (Zandalinas *et al.*, 2020b). This finding suggests that AtNEET, and potentially the levels of 2Fe-  
87 2S clusters in plants, could play a key role in the iron sensing mechanism of plants (in leaves). In  
88 both mammalian and plant cells, suppression of NEET protein levels or stabilization of the 2Fe-  
89 2S clusters of NEET proteins resulted, therefore, in the accumulation of iron and ROS in  
90 chloroplasts or mitochondria, activation of the oxidative stress response, activation of mechanisms  
91 that prevented iron accumulation in organelles, and cell death (Sohn *et al.*, 2013; Darash-Yahana  
92 *et al.*, 2016; Zandalinas *et al.*, 2020b).

93 Because the constitutive suppression of NEET protein function has a deleterious effect on plant or  
94 animal cells, we recently used the Dexamethasone (DEX)-inducible system to drive the expression  
95 of NAF-1 or its H114C dominant-negative mutant in cancer cells (Karmi *et al.*, 2021). This  
96 analysis revealed that in addition to enhanced mitochondrial iron and ROS levels, suppression of  
97 NAF-1 function in cancer cells resulted in the enhanced expression of thioredoxin interacting  
98 protein (TXNIP) which binds thioredoxin (TRX) and induces oxidative stress (Karmi *et al.*, 2021).  
99 Despite repeated attempts, we could not however find a homolog of TXNIP in the genome of  
100 Arabidopsis, leaving this aspect of NEET function in plant cells unknown. To further explore the  
101 function of AtNEET in plants, we used in this study the same DEX-inducible expression system  
102 (Aoyama and Chua, 1997) to drive the expression of AtNEET, or its mutated dominant-negative  
103 copy H89C, in mature transgenic plants. Using this system we conducted a time-course proteomics  
104 analysis to track the cellular changes occurring in plant cells following the inducible expression of  
105 AtNEET or H89C. Our findings revealed that suppression of AtNEET function resulted in drastic  
106 changes in the expression of different members of the ferredoxin (Fd), Fd:TRX reductase (FTR),  
107 and TRX network of Arabidopsis, as well as in the expression level of different members of the  
108 cytosolic cluster assembly pathway of plants. In addition, the levels of Yellow Stripe-Like 6  
109 (YSL6), a protein involved in the export of iron from the chloroplast or vacuole was elevated, as  
110 well as the expression of different proteins involved in chlorophyll degradation and ROS  
111 scavenging. Taken together, our findings reveal new roles for AtNEET in regulating the Fd-TFR-  
112 TRX network of cells, iron mobilization from the chloroplast, and cytosolic 2Fe-2S cluster  
113 assembly. In addition, we show that the function of AtNEET is affecting the expression of several  
114 different ROS scavenging proteins including glutathione peroxidases (GPXs) that play a key role  
115 in the regulation of ferroptosis and other stress response pathways in different organisms  
116 (Distéfano *et al.*, 2021; Karmi *et al.*, 2021).

## 117 MATERIALS AND METHODS

### 118 Vector construction and generation of transgenic plants

119 AtNEET (At5G51720) and H89C (Nechushtai et al., 2012; Zandalinas *et al.*, 2020b) cDNAs were  
120 amplified by PCR and cloned into the glucocorticoid-inducible transformation pTA7002 vector  
121 using XhoI and SpeI sites (Aoyama and Chua, 1997; Supplementary Fig. S1). *Agrobacterium*  
122 *tumefaciens* strain GV3101 was transformed with both constructs and used to obtain DEX-induced  
123 AtNEET- and H89C-overexpressing lines using the floral dip procedure (Zhang *et al.*, 2006). At  
124 least 10 independent lines were selected using hygromycin resistance and expression of AtNEET  
125 or H89C upon DEX treatment was determined by quantitative real-time polymerase chain reaction  
126 (RT-qPCR; Fig. 1) as described below. Three independent homozygous lines (T4) from both  
127 transgenic lines were selected based on both DEX-induced phenotype and NEET or H89C  
128 expression (Figs. 1, 2).

### 129 Growth conditions and DEX treatment

130 Col plants and inducible AtNEET and H89C lines were grown in peat pellets (Jiffy-7, Jiffy;  
131 <http://jiffygroup.com/en/>) at 23 °C under long day growth conditions (16-h light/8-h dark, 50  $\mu\text{mol}$   
132  $\text{m}^{-2} \text{s}^{-1}$ ). To induce AtNEET or H89C expression, 15-day-old plants were sprayed with a 30  $\mu\text{M}$   
133 DEX (Sigma) solution containing 0.01% (w/v) Tween 20 at the same time of day (10 AM) for 4  
134 days (Fig. 1A). After the second DEX treatment at day 2, plants were subjected to a 6 h-high light  
135 treatment (600  $\mu\text{mol} \text{m}^{-2} \text{s}^{-1}$  from 12 to 6 PM). Leaves of each line were collected at time 0 h  
136 (before DEX treatment) and at 24 h, 48 h, 72 h, 96 h, 10 d and 14 d at the same time of the day (9  
137 AM; Fig. 1A). Each experiment was repeated at least three times.

### 138 Proteomics analysis

139 Leaves from at least 5 plants of Col and inducible AtNEET and H89C lines were collected at each  
140 time point as described above (Fig. 1A) and ground to a fine powder in liquid nitrogen with a  
141 mortar and pestle. Sample processing, mass spectrometry (MS) analysis and protein identification  
142 were performed according to (Dahal *et al.*, 2016; Karmi *et al.*, 2021). Briefly, grounded leaf tissue  
143 was thawed directly into a 1:1 mix of phenol and buffer (Tris-saturated phenol, 0.1 M Tris-HCl  
144 pH 8.8, 10 mM EDTA, 200 mM DTT, 0.9 M sucrose). Samples were resuspended in urea buffer  
145 (6 M urea, 2 M thiourea, 100 mM ammonium bicarbonate, pH 8.0) and protein quantified using

146 EZQ. An equal amount of protein (50  $\mu\text{g}$ ) from each sample was digested with trypsin and peptides  
147 were cleaned up using C18 100  $\mu\text{L}$  tips (Pierce), lyophilized, and resuspended in 25  $\mu\text{L}$  of 5%  
148 acetonitrile (ACN), 0.1% formic acid (FA). Peptides were analyzed by MS as follows: a 1  $\mu\text{L}$   
149 injection was made onto a C8 trap column (ThermoFisher,  $\mu$ -precolumn – 300  $\mu\text{m}$  i.d. x 5 mm, C8  
150 Pepmap 100, 5  $\mu\text{m}$ , 100  $\text{\AA}$ ) and separated using a 20 cm long x 75  $\mu\text{m}$  inner diameter pulled-needle  
151 analytical column packed with Waters BEH-C18, 1.7  $\mu\text{m}$  reversed phase resin. Peptides were  
152 separated and eluted from the analytical column with a gradient of ACN at 300  $\text{nL min}^{-1}$ . The  
153 Bruker nanoElute system was attached to a Bruker tims TOF-PRO mass spectrometer via a Bruker  
154 Captive Spray source. Liquid chromatography gradient conditions were as follows: initial  
155 conditions were 3% B (A: 0.1% FA in water, B: 99.9% ACN, 0.1% FA), followed by 20 min ramp  
156 to 17% B, 17-25% B over 33 min, 25-37% B over 16 min, 37-80% B over 7 min, hold at 80% B  
157 for 9 min, ramp back (1 min) and hold (6 min) at initial conditions. Total run time was 92 min. MS  
158 data were collected in positive-ion data-dependent PASEF mode over an  $m/z$  range of 100 to 1700.  
159 One MS and ten PASEF frames were acquired per cycle of 1.16 sec. Target MS intensity for MS  
160 was set at 10000 counts  $\text{s}^{-1}$  with a minimum threshold of 2000 counts  $\text{s}^{-1}$ . An ion-mobility-based  
161 rolling collision energy was used: 20 to 59 eV. An active exclusion/reconsider precursor method  
162 with release after 0.4 min was used. If the precursor (within mass width error of 0.015  $m/z$ ) was  
163 higher than 4 times the signal intensity in subsequent scans, a second MSMS spectrum was  
164 collected. Isolation width was set to 2  $m/z$  (<700 $m/z$ ) or 3 (800-1500  $m/z$ ). For protein  
165 identification, the data were searched against TAIR11 using the following parameters: trypsin as  
166 enzyme, 2 missed cleavages allowed; 20 ppm mass error on precursor, 0.1 Da mass error on CID  
167 MSMS fragments; carbamidomethyl-Cys fixed modification; oxidized-Met, deamidated-N/Q as  
168 variable modifications. Data was then filtered as follows: all identified peptides were filtered for  
169  $p < 0.01$  false discovery rate. Data was analyzed using a custom R program using a spectrum count  
170 threshold of  $\geq 2$  in at least three replicates per group (Supplementary Table S1).

## 171 **Electrolyte leakage**

172 Leaves of Col plants and inducible AtNEET and H89C lines from time point 14 d (Fig. 1A) were  
173 sampled for electrolyte leakage measurements as described in (Zandalinas *et al.*, 2020a) with few  
174 modifications. Leaves were immersed in 10 mL of distilled water in 50-mL falcon tubes. Samples  
175 were shaken at room temperature for 1 h and the conductivity of the water was measured using a

176 conductivity meter. Leaves were then heated to 95 °C using a water bath for 20 min, shaken at  
177 room temperature for 1 h and the conductivity of the water was measured again. The electrolyte  
178 leakage was calculated as the percentage of the conductivity before heating over that of after  
179 heating.

#### 180 **RT-qPCR analysis**

181 Relative expression analysis by RT-qPCR was performed according to (Zandalinas *et al.*, 2016)  
182 by using the CFX Connect Real-Time PCR Detection System (Bio-Rad) and gene-specific primers  
183 (Supplementary Table S2).

#### 184 **Photosynthetic parameters**

185 Quantum yield of Photosystem II ( $\Phi_{PSII}$ ) of Col and inducible AtNEET and H89C lines was  
186 measured using a portable fluorometer (FluorPen FP 110/S, Photon Systems Instruments, Czech  
187 Republic) at each time point described above (Fig. 1A). Photosynthetic measurements were taken  
188 for at least 5 plants using two leaves per plant for each time point, line, and experimental repeat.

#### 189 **Chlorophyll measurements**

190 Chlorophyll extraction was performed as described in (Zandalinas *et al.*, 2020b). Briefly, about  
191 50–70 mg of leaves from each line were incubated in 5 mL of N,N-dimethylformamide (DMF) at  
192 4 °C in the dark for 7 d. The absorbance of 1 mL of the DMF extraction was read in a  
193 spectrophotometer at 603, 647 and 664 nm, using 1 mL of clean DMF as blank.

#### 194 **Statistical analysis**

195 Statistical analyses were performed by two-tailed Student's t-test. Results are presented as the  
196 Mean  $\pm$  SD (asterisks denote statistical significance at  $P < 0.05$  with respect to time 0 h or Col  
197 plants). One-way ANOVA along with likelihood ratio (LRT) tests (between time points of each  
198 genotype) were used to determine statistically significant changes in protein abundance.

199

200

## 201 RESULTS

202

### 203 Inducible expression of H89C in Arabidopsis

204 To control the expression of AtNEET and H89C, we generated transgenic plants in which the  
205 expression of AtNEET or H89C was driven by a DEX-inducible promoter (Supplementary Fig.  
206 S1). To study changes in protein levels in control (Col), AtNEET, and H89C plants following  
207 DEX-induced AtNEET or H89C expression, we grew plants under controlled growth conditions  
208 for 15 days and then treated them with DEX (30  $\mu\text{M}$ ) once a day for 4 days (Fig. 1A). To study  
209 the impact of a stress treatment on AtNEET function, on day 2 all plants were subjected to a 6-  
210 hour light stress treatment of 600  $\mu\text{mol m}^{-2} \text{s}^{-1}$ . Plants were kept for a total of 14 days from the  
211 beginning of the experiment and sampled at times 0, 24, 48 (immediately after the light stress  
212 treatment), 72, and 96 hours, and 10 and 14 days (Fig. 1A). As shown in Fig. 1B, AtNEET  
213 transcript expression could be induced by DEX to various levels in different homozygous AtNEET  
214 or H89C lines on day 4 (Fig. 1A) of the experiment. Based on this analysis, we chose three  
215 AtNEET and three H89C lines for further studies (AtNEET lines 4, 7, and 10, and H89C lines 1,  
216 7, and 9; indicated by stars in Fig. 1B). As shown in Fig. 1C, DEX-treated H89C plants displayed  
217 abnormal growth, chlorotic appearance, and ion leakage, indicative of injury or cell death, at 14  
218 days, while control and AtNEET plants (DEX- or mock-treated), or mock-treated H89C plants,  
219 did not. These findings reveal that the inducible expression of H89C had a deleterious effect on  
220 plants (similar to constitutive expression of H89C; Zandalinas *et al.*, 2020b), and demonstrated  
221 that the experimental system developed could be used to study the function of NEET proteins in  
222 Arabidopsis.

223 To further characterize plants with inducible expression of AtNEET or H89C, we conducted RT-  
224 qPCR analysis of AtNEET expression in the selected AtNEET and H89C lines (Fig. 1B) subjected  
225 to the treatments shown in Fig. 1A. As shown in Fig. 2A, DEX-induced AtNEET/H89C expression  
226 could be detected in the different lines as early as 24 h post the initial application of DEX.  
227 Interestingly, enhanced expression of AtNEET/H89C could also be detected in at least 2 out of 3  
228 AtNEET or H89C lines even at 10 and 14 days (Fig. 2A). To test the effect of AtNEET or H89C  
229 expression on photosynthetic activity of plants, we measured the quantum yield of PSII ( $\phi_{\text{PSII}}$ ) of  
230 all lines included in the experiment. As shown in Fig. 2B, a significant decrease in  $\phi_{\text{PSII}}$  could only



231 be detected in the three H89C lines at days 10 and 14. In contrast, DEX-treated control or AtNEET  
232 plants did not display any significant change in  $\phi_{PSII}$ . To determine the impact of AtNEET or H89C  
233 expression on chlorophyll content, we measured chlorophyll levels of all lines included in the  
234 experiment. As shown in Fig. 2C, a significant decrease in chlorophyll content was apparent in all  
235 H89C plants on days 10 and 14, as well as at 96 h for some of the H89C lines. In contrast, DEX-  
236 treated control or AtNEET plants did not display any significant change in chlorophyll content.  
237 Based on the analysis shown in Figs. 1 and 2 we chose the AtNEET line #4 and the H89C line #1  
238 for our in-depth proteomics analysis of AtNEET and H89C induced changes in protein abundance.

239

#### 240 **Proteomics analysis of AtNEET and H89C plants following DEX application**

241 Using the experimental design shown in Fig. 1A we conducted an untargeted global proteomics  
242 analysis of wild type (WT, Col), AtNEET (AtNEET #4) and H89C (H89C #1) plants. For each  
243 time point we used three biological repeats of each line, each with a pool of at least 15 plants.  
244 Following identification of the different proteins in each time point, their relative level was  
245 compared to time 0 h (within each genotype) and a statistical analysis of fold change in abundance  
246 compared to time 0 h was conducted (Supplementary Table S1). Because we treated with DEX  
247 and sampled the Col, AtNEET, and H89C lines, side-by-side (Fig. 1A), we could compare the  
248 changes that occur in AtNEET plants to those that occur in H89C plants, as well as the changes  
249 that occur in Col following DEX application, and the changes associated with light stress in Col,  
250 AtNEET and H89C plants. Because the only difference between the AtNEET and the H89C  
251 proteins is in one amino acid that causes the cluster to become more stable by more than 10-fold  
252 (Nechushtai *et al.*, 2012) and induced a dominant-negative effect on AtNEET function (Zandalinas  
253 *et al.*, 2020b), the inducible expression of H89C could be considered an inhibition of AtNEET  
254 cluster transfer function, while the inducible expression of AtNEET could be considered as an  
255 enhancement of AtNEET cluster transfer function. In this respect it should be noted that compared  
256 to AtNEET, the redox potential of the H89C cluster is shifted by nearly 300 mV and becomes  
257 more negative (Nechushtai *et al.*, 2012). While the cluster transfer function of AtNEET is  
258 suppressed, the electron transfer function of AtNEET could therefore be enhanced in the H89C  
259 mutant.

260 As shown in Fig. 3A, global differences in protein abundance between the different lines were  
261 primarily apparent at the 96 h and the 10- and 14-day time points (revealed by a PCA analysis of  
262 all results combined). This finding was in agreement with changes in  $\phi_{PSII}$  and chlorophyll content  
263 that were also apparent at these time points (Fig. 2B, C), suggesting that it took time for the  
264 inducible expression of H89C and AtNEET to cause an overall change in protein abundance. While  
265 changes in AtNEET protein abundance in control (Col) plants were not significant throughout the  
266 experiment, the abundance of the AtNEET and H89C proteins was elevated at all time points (Fig.  
267 3B). Interestingly, while the abundance of H89C was stable throughout the entire experiment  
268 (about 4-5-fold higher compared to time 0 h), the abundance of AtNEET was much more variant  
269 and higher than that of H89C (Fig. 3B). This finding could suggest that due to the toxicity of the  
270 H89C protein, its levels were maintained low in cells. This possibility could also explain why it  
271 took time for H89C plants to develop a visible phenotype (Fig. 1C) and cause global changes in  
272 protein abundance (Fig. 3A).

273 Constitutive expression of H89C in seedlings was previously reported to cause oxidative stress  
274 and induce the expression of several different ROS-response transcripts (Zandalinas *et al.*, 2020b).  
275 To determine whether inducible expression of H89C in mature plants would also cause the  
276 activation of an oxidative stress response, we used RT-qPCR to measure the transcript expression  
277 of two ROS response transcripts, namely *APX1* and *ZAT12* (Davletova *et al.*, 2005b,a). As shown  
278 in Fig. 3C, the expression of *APX1* and *ZAT12* was significantly elevated in H89C plants at all  
279 time points. This finding suggests that H89C expression results in enhanced oxidative stress, but  
280 that the plant buffering capacity for oxidative stress could shield its metabolism for at least 72 h  
281 before changes in chlorophyll,  $\phi_{PSII}$ , and global protein abundance occur (Figs. 2 B, C, 3A).

282 To compare the effects of AtNEET or H89C inducible expression in mature plants to those of  
283 constitutive AtNEET or H89C expression in seedlings, we compared the large proteomics data  
284 sets obtained in this study (Supplementary Table S1) with the proteomics datasets previously  
285 obtained for constitutive expression of AtNEET or H89C in seedlings (Zandalinas *et al.*, 2020b).  
286 As shown in Fig. 4, more than 50% of the proteins previously identified in seedlings with  
287 constitutive expression of AtNEET or H89C (Zandalinas *et al.*, 2020b) were also identified by our  
288 current inducible expression analysis conducted with mature plants. This finding supported the  
289 validity of our experimental system and demonstrated that compared to the previous analysis

290 conducted with constitutive expression of AtNEET or H89C, our inducible expression strategy  
291 identified many more proteins.

292

### 293 **Altered abundance of different components of the cytosolic iron-sulfur cluster assembly** 294 **(CIA) pathway in AtNEET and H89C plants following DEX application**

295 We previously reported that the steady state expression of several different transcripts involved in  
296 the iron-sulfur biogenesis pathways of the cytosol, chloroplast and mitochondria is altered in plants  
297 with constitutive expression level of H89C (Zandalinas *et al.*, 2020b). However, whether these  
298 changes are directly related to H89C, or an indirect effect of its constitutive expression on plants  
299 was unknown. As shown in Fig. 5A, using the inducible expression system, we now report that  
300 triggering the expression of AtNEET or H89C results in direct, and in many cases immediate,  
301 changes in the abundance of different proteins involved in the CIA pathway. Of particular interest  
302 to the function of AtNEET are CIA1, NBP35 and DRE2, especially since AtNEET was found to  
303 transfer its clusters to DRE2 (Zandalinas *et al.*, 2020b), and DRE2 transfer its clusters to NBP35  
304 that then transfer them to the CIA1-associated complex (Zhang *et al.*, 2008; Balk and Pilon, 2011).  
305 The changes in transcript expression reported previously in plants with constitutive expression of  
306 H89C (Zandalinas *et al.*, 2020b) are therefore strengthened and extended now with results from a  
307 dynamic inducible system that is coupled to proteomics analysis (Figs. 1A, 5A). Moreover,  
308 changes in the abundance of CIA1, that plays a key function in the CIA pathway (Braymer *et al.*,  
309 2021), were not previously identified and are therefore a new finding of this study (Fig. 5A). As  
310 shown in Fig. 5B, the inducible expression of H89C or AtNEET also resulted in changes in the  
311 steady-state transcript levels of CIA1, further supporting its identification by the proteomics  
312 analysis. Taken together, the results shown in Fig. 5 support our previous study that used  
313 constitutive expression of AtNEET and H89C in seedlings (Zandalinas *et al.*, 2020b) and reveal  
314 that CIA1 is directly responding to changes in AtNEET function in mature plants.

315

### 316 **Altered abundance of iron efflux proteins following alterations in AtNEET function**

317 We previously reported that constitutive expression of H89C resulted in the accumulation of iron  
318 in chloroplasts that was paradoxically coupled with transcriptional activation of leaf iron

319 deficiency responses (Zandalinas *et al.*, 2020b). However, whether this response was also  
320 accompanied by changes in the expression of different iron transport proteins was unknown. As  
321 shown in Fig. 6, using the inducible expression system, we found that triggering the expression of  
322 H89C in mature plants results in an early and strong induction in the abundance of the chloroplastic  
323 (and potentially also vacuolar) iron export protein YSL6 (Divol *et al.*, 2013; Conte *et al.*, 2013).  
324 In contrast, abundance of the chloroplastic iron import protein PIC1 (Duy *et al.*, 2007, 2011)  
325 primarily increased following inducible expression of AtNEET (Fig. 6). Interestingly, the  
326 expression level of transcripts encoding YSL6 or PIC1 did not significantly change in transgenic  
327 seedlings with constitutive expression of AtNEET or H89C (Zandalinas *et al.*, 2020b). Our new  
328 finding that the abundance of the iron export protein YSL6 is rapidly enhanced in H89C leaves  
329 upon DEX treatment supports our previous findings that chloroplasts of H89C seedlings with  
330 constitutive expression of H89C accumulate high levels of iron (and therefore enhance the  
331 abundance of YSL6; Fig. 6), while activating iron deficiency responses (Zandalinas *et al.*, 2020b).

332

### 333 **Alterations in the Fd-FTR-TRX network of Arabidopsis following the inducible expression** 334 **of AtNEET or H89C**

335 In a previous study we demonstrated that inducible expression of the NAF-1 H114 mutant (with a  
336 high 2Fe-2S cluster stability) in cancer cells results in the enhanced expression of TXNIP that  
337 binds TRXs and induces oxidative stress and ferroptosis (Karmi *et al.*, 2021). Although plants  
338 were not found to have a clear homolog of TXNIP, they contain an extended network of TRXs  
339 that is in many instances linked to Fd via FTRs (*e.g.*, Kang *et al.*, 2019; Balsera and Buchanan,  
340 2019; Cejudo *et al.*, 2021; Ojeda *et al.*, 2021; Fig. 7A). AtNEET was originally identified as an  
341 2Fe-2S cluster donor to Fd1 (Nechushtai *et al.*, 2012), suggesting that alterations in AtNEET  
342 cluster transfer function could cause alterations in the entire Fd-FTR-TRX network. As shown in  
343 Fig. 7A, the inducible expression of AtNEET or H89C indeed caused drastic changes in the  
344 abundance of different Fds, FTRs, and TRXs. Examples for these changes include the TRX  
345 AT1G21350 that was specially upregulated, the TRX AT1G76020 that was specifically  
346 downregulated, and FdC1 that was downregulated following H89C induction plants, and Fd1 and  
347 the 2Fe-2S Fd-like protein AT4G32590 that were upregulated following AtNEET induction in  
348 plants. As shown in Fig. 7B, the steady state level of transcripts encoding some of these proteins

349 was also significantly altered following the inducible expression of AtNEET or H89C. The  
350 expression of *TPX1* and *TPX2* was also found to be upregulated in our previous transcriptomics  
351 data set of plants with constitutive expression of H89C (Supplementary Fig. S2). Taken together,  
352 the findings presented in Fig. 7 support a role for AtNEET in modulating and supporting the TRX  
353 network of Arabidopsis, possibly through providing 2Fe-2S clusters to Fd.

354 Because Fds transfer electrons to many different essential proteins in plant cells, we also studied  
355 the abundance of additional proteins that serve as electron acceptors of Fds. As shown in  
356 Supplementary Fig. S3, the abundance of pheophorbide A oxygenase (PAO), a Rieske-type iron–  
357 sulfur protein involved in chlorophyll degradation, was rapidly upregulated in H89C plants.  
358 Chlorophyll degradation is also part of the initial Fe deficiency response to prevent the  
359 accumulation of toxic tetrapyrrole intermediaries. In addition, the abundance of the nitrogen stress  
360 related protein glutamine synthetase 2 (GS2) was upregulated in AtNEET plants. These findings  
361 extended the list of cellular pathways potentially supported by AtNEET to include chlorophyll  
362 catabolism and nitrogen metabolism.

363

#### 364 **Changes in the abundance of different ROS scavenging enzymes following alterations in** 365 **AtNEET function**

366 The TRX network is directly linked to the function of different proteins that scavenge ROS such  
367 as H<sub>2</sub>O<sub>2</sub> (*e.g.*, through GPX or the TRX-peroxiredoxin cycles; Balsera and Buchanan, 2019; Foyer  
368 *et al.*, 2020; Meyer *et al.*, 2020). Because the inducible expression of AtNEET had such a dramatic  
369 effect on the Fd-FTR-TRX redox network of Arabidopsis (Fig. 7), we tested the abundance of  
370 different proteins involved in H<sub>2</sub>O<sub>2</sub> scavenging (Willems *et al.*, 2016). As shown in Fig. 8, the  
371 abundance of GPX5 and GPX6, monodehydroascorbate reductase (MDAR), and three ascorbate  
372 peroxidases (APX1, APX6 and stromal APX) was altered following the inducible expression of  
373 AtNEET or H89C. The expression of transcripts encoding *GPX6* and *stromal APX* was also found  
374 to be upregulated in our previous transcriptomics data set of plants with constitutive expression of  
375 H89C (Supplementary Fig. S2). The findings described above are particularly interesting since  
376 previous studies found that the mammalian NEET protein mitoNEET can be reduced by  
377 glutathione (GSH) or GSH reductase (GR), as well as oxidize H<sub>2</sub>O<sub>2</sub> (Landry and Ding, 2014;  
378 Landry *et al.*, 2015). In addition to altering the abundance different components of the Fd-FTR-

379 TRX network (Fig. 7), the disruption in AtNEET function could therefore also impair the H<sub>2</sub>O<sub>2</sub>  
380 metabolizing capacity of cells.

381 Because our time course proteomics analysis was conducted with only one selected H89C line, we  
382 tested changes in the expression of selected transcripts in all three H89C lines. As shown in  
383 Supplementary Fig. S4, changes in the expression of *Fd*, *DRE2*, *SufB*, *SufD*, and *GRSX14* were  
384 similar between all three lines at day 4.

385

## 386 DISCUSSION

387 Studying gene function using constitutive gain- or loss-of-function mutants is a powerful approach.  
388 However, it has the drawback that the altered gene function exists from the very first stage of the  
389 organism (mutant) development. In cases in which altering the gene function has deleterious  
390 effects, such as in the case of the H89C mutant of AtNEET (Zandalinas *et al.*, 2020b), the study  
391 of gene function at a mature stage of the organism might not even be possible. To address this  
392 problem and to study AtNEET function in mature plants, we used an inducible expression system.  
393 This system allowed us to observe dynamic changes in protein abundance resulting from disrupting  
394 the cluster-transfer function of AtNEET in cells. When the function of two pathways or proteins  
395 is coupled in cells, altering the function of one of them could cause the elevated or suppressed  
396 expression or abundance of the other, depending on the nature of the regulatory circuit that controls  
397 the expression of the pathway (*e.g.*, negative or positive feedback loops). For this reason, we  
398 considered each significant change in protein abundance, observed between different time points  
399 in AtNEET and/or H89C plants following DEX application in our experiments (up- or down-  
400 regulated), as evidence for a potential link to AtNEET function.

401 To further address the function of AtNEET under altered environmental conditions, and to place  
402 the biological systems linked to AtNEET under strenuous conditions, we subjected all plants  
403 studied to a light stress treatment at day two following DEX application (Fig. 1A). As shown in  
404 Supplementary Fig. S3, for FNR expression, this treatment affected all plant lines studied (WT,  
405 H89C and AtNEET). However, compared to WT, it had a more significant effect on protein  
406 abundance in the H89C and/or AtNEET, as shown for example in Fig. 7A for TPX1, as well as  
407 many other examples discussed below. Changes that occurred within the first 24 h were therefore

408 related to the DEX induced alterations in AtNEET or H89C expression, while changes that occur  
409 at 48 h and onwards were changes that occurred due to the DEX induced alterations in H89C or  
410 AtNEET expression, as well as the light stress treatment. Overall, there was a good overlap  
411 between changes in protein abundance identified by the current proteomics analysis conducted  
412 with inducible expression of AtNEET and H89C, and the previous study that used constitutive  
413 expression of these proteins (*e.g.*, Fig. 4; Zandalinas *et al.*, 2020b). In addition, the inducible  
414 expression of H89C had deleterious effects on plant growth, chlorophyll content and cell integrity,  
415 as evident by the visible phenotype, ion leakage measurements and chlorophyll content (Figs. 1,  
416 2). However, as discussed below, compared to the constitutive expression of AtNEET or H89C,  
417 the dynamics nature of the current experimental design allowed us to identify additional and/or  
418 new clues to AtNEET function in plants and revealed potential new links between AtNEET and  
419 different metabolic and acclimation networks in plants.

420 We previously reported that the expression of several transcripts encoding chloroplastic and  
421 cytosolic Fe-S cluster assembly proteins is upregulated in plants with constitutive expression of  
422 H89C (Zandalinas *et al.*, 2020b). In addition, we reported that the expression level of several Fe-  
423 S proteins is suppressed in H89C plants, and that AtNEET can transfer its clusters to DRE2 that is  
424 a member of the CIA complex in Arabidopsis (Zandalinas *et al.*, 2020b). However, whether the  
425 expression of different CIA proteins is altered in response to altering the function of AtNEET was  
426 unknown. Here we show for the first time that the protein expression of CIA1 and DRE2 is  
427 upregulated upon inducible expression of AtNEET, but not H89C, suggesting that augmenting the  
428 level of AtNEET results in higher expression of some CIA proteins (Fig. 5). Taken together with  
429 our previous transcriptomics analysis (Zandalinas *et al.*, 2020b), our findings, shown in Fig. 5,  
430 support a model in which AtNEET plays a central role in transferring clusters from within the  
431 chloroplast to the cytosol and that altering the cluster transfer ability of AtNEET impairs this  
432 process (Fig. 9). In this respect it should be noted that several recent studies support a similar  
433 function for mammalian NEET proteins, forming a cluster transfer relay between the mitochondria  
434 and the cytosol. In this new role, MiNT (that is not found in plants) transfers its clusters to  
435 mitoNEET through the VOLTAGE-DEPENDENT ANION CHANNEL (VDAC) channel, that  
436 then transfers its clusters to NAF-1 and Anamorsin (a component of the mammalian CIA complex  
437 and a homolog of the plant DRE2 protein; Lipper *et al.*, 2015; Karmi *et al.*, 2017, 2022). Although  
438 the chloroplast is not known to contain VDAC, and NEET proteins are represented in Arabidopsis

439 by only one gene member (AtNEET), it appears that transferring clusters from within an organelle  
440 (mitochondria in mammalian and chloroplast in plants) to the cytosol (to the CIA pathway) is a  
441 conserved function of NEET proteins.

442 We previously proposed that suppressing the cluster transfer activity of AtNEET via constitutive  
443 expression of H89C activates the iron deficiency response of Arabidopsis, potentially due to  
444 enhanced accumulation of iron in the chloroplast that is coupled with decreased availability of Fe-  
445 S clusters in the cytosol (Zandalinas *et al.*, 2020b). This model was proposed based on changes  
446 the expression level of several transcripts involved in the iron deficiency response of Arabidopsis,  
447 as well as changes in the expression of different transcripts involved in iron efflux from the  
448 chloroplast. However, the impact of suppressing AtNEET cluster transfer function on the  
449 expression level of different proteins involved in these pathways was unknown. Here we report  
450 for the first time that the protein expression of YSL6, involved in the export of iron from the  
451 chloroplast (and potentially the vacuole) to the cytosol (Divol *et al.*, 2013; Conte *et al.*, 2013), is  
452 rapidly and strongly enhanced following H89C induction (with some induction at early and late  
453 time points following AtNEET induction; Fig. 7). In addition, we report that the protein expression  
454 level of PIC1, involved in iron uptake into chloroplasts (Duy *et al.*, 2007, 2011), is primarily  
455 enhanced upon induction of AtNEET expression (with some induction at early and late time points  
456 upon H89C induction; Fig. 7). Taken together with our transcriptomics analysis (Zandalinas *et al.*,  
457 2020b), the findings presented in Fig. 7 support the proposed involvement of AtNEET in iron  
458 metabolism in plant cells and demonstrate for the first time that changes in AtNEET cluster transfer  
459 function translate into changes in the expression of proteins involved in the mobilization of iron  
460 from and to the chloroplast (Fig. 9).

461 We previously demonstrated that AtNEET can transfer its clusters to Fd1 (Nechushtai *et al.*, 2012).  
462 However, the biological significance of this cluster transfer reaction was unknown. Here we  
463 demonstrate for the first time, that upon suppression of AtNEET cluster transfer function, major  
464 alterations occur in the protein abundance of different Fds, FTRs and TRXs (Fig. 6). Thus, while  
465 the abundance of Fd1, Fd2, FdC1, and an 2Fe-2S Fd was either suppressed or unchanged upon  
466 induction of H89C expression, the abundance of Fd1, Fd2, and the 2Fe-2S Fd-like protein was  
467 mostly enhanced upon induction of AtNEET expression (Fig. 6). A similar pattern was observed  
468 for at least three FTRs (Fd-TRX reductase, FTRA1, and FTRA2). In contrast, TRXs displayed a



469 more variable response with some TRXs upregulated in H89C (*e.g.*, AT1G21350) and some  
470 suppressed (*e.g.*, AT1G76020). Alterations in AtNEET cluster transfer function could therefore be  
471 associated with significant changes in the Fd-FTR-TRX network and this finding could be  
472 explained by a deficiency in the ability of AtNEET to donate its clusters to Fd (Nechushtai *et al.*,  
473 2012; Fig. 9). If AtNEET is prevented from transferring its clusters to Fds (via *e.g.*, H89C  
474 expression), the entire Fd-FTR-TRX could therefore be affected, resulting in drastic changes in  
475 the cells' redox states and thereby in many cellular functions. In support of this possibility is also  
476 the reduced expression of transcripts encoding Fd1 upon DEX induction of H89C (Supplementary  
477 Fig. S4). AtNEET could therefore be supporting the Fd-FTR-TRX network by keeping Fd supplied  
478 with 2Fe-2S cluster, maintaining its activity.

479 Because some plant GPXs are thought to utilize TRXs for their reduction/oxidation cycles  
480 (Maiorino *et al.*, 2015; Meyer *et al.*, 2020) that would directly control the levels of H<sub>2</sub>O<sub>2</sub>, as well  
481 as the redox regulation of many proteins in plants, the suppression of Fd function upon AtNEET  
482 cluster transfer inhibition could also cause the induction of an oxidative stress response (also  
483 shown by *Zat12* and *APX1* induction in Fig. 3C). Indeed, the abundance of two GPXs was found  
484 to be significantly enhanced upon induction of AtNEET expression (Fig. 8), supporting a link  
485 between AtNEET and GPX expression (Fig. 9). In this respect it should be noted that in  
486 mammalian cells GPXs are thought to regulate the process of ferroptosis (Jiang *et al.*, 2021), and  
487 that we recently reported that suppressing the cluster transfer function of NAF-1 (via inducible  
488 expression of H114C) altered GPX expression, activated ferroptosis, and caused the enhanced  
489 accumulation of TXNIP (a major regulator of the mammalian TRX network) in cancer cells (Karmi  
490 *et al.*, 2021). Taken together, our findings in plant and mammalian cells reveal a potentially new  
491 and conserved role for NEET proteins in regulating the TRX network of cells, as well as suggest  
492 that AtNEET could play a role in ferroptosis activation in plant cells (Zandalinas *et al.*, 2020b;  
493 Distéfano *et al.*, 2021; Karmi *et al.*, 2021). In the context of this potential new role for AtNEET in  
494 supporting the Fe-FTR-TRX network and GPX function by providing clusters to Fd (Fig. 9), it is  
495 worth mentioning that previous studies conducted with the mammalian mitoNEET protein  
496 revealed that this protein interacts with glutathione reductase (GR), can accept electrons from  
497 glutathione and can oxidize H<sub>2</sub>O<sub>2</sub> (Landry and Ding, 2014; Landry *et al.*, 2015). Based on these  
498 findings it was proposed that mitoNEET could function as a sensor or scavenger of ROS. While a  
499 similar function was not reported for AtNEET, our findings that suppressing the cluster transfer

500 function of AtNEET causes oxidative stress in plants (Zandalinas *et al.*, 2020b; Fig. 3C), might  
501 support a similar function for AtNEET in plants. The nature of the interactions between AtNEET  
502 and the Fd-FTR-TRX and/or the glutathione/GR/GPX networks requires further studies, especially  
503 since NEET proteins can transfer or accept clusters, as well as electrons, to or from other cellular  
504 proteins (Zuris *et al.*, 2011; Nechushtai *et al.*, 2012; Landry and Ding, 2014; Landry *et al.*, 2015;  
505 Li *et al.*, 2018; Tasnim *et al.*, 2020).

506

## 507 SUPPLEMENTARY DATA

508 Supplementary data are available at *JXB* online.

509 **Supplementary Fig. S1.** The dexamethasone (DEX)-inducible system to drive the expression of  
510 AtNEET, or its mutated dominant-negative copy H89C, in mature transgenic Arabidopsis plants.

511 **Supplementary Fig. S2.** Changes in steady state expression of different transcripts involved in  
512 reactive oxygen species (ROS) scavenging reported previously (Zandalinas *et al.*, 2020b) in two  
513 different lines with constitutive expression of AtNEET or H89C.

514 **Supplementary Fig. S3.** Changes in protein expression associated with other functions of  
515 ferredoxins during the course of the experiment.

516 **Supplementary Fig. S4.** Changes in steady state expression of different transcript associated with  
517 iron-sulfur cluster assembly in the chloroplast and cytosol in three different homozygous H89C  
518 lines (H1, H7 and H9) following 4 doses of DEX application (Fig. 1A).

519 **Supplementary Table S1.** List of proteins altered following DEX treatment of Col and the  
520 inducible AtNEET and H89C lines.

521 **Supplementary Table S2.** Transcript-specific primers used for relative expression analysis by  
522 RT-qPCR.

523

## 524 ACKNOWLEDGMENTS

525 Proteomic analyses were performed by The Charles W Gehrke Proteomics Center at the University  
526 of Missouri, Columbia, Missouri, USA (<http://proteomics.missouri.edu>).

527

## 528 **AUTHOR CONTRIBUTIONS**

529 SIZ and RM conceptualized the project, SIZ conducted the experiments, SIZ and LS generated  
530 vectors and transgenic plants, SIZ, DGM-C, RN, and RM wrote the manuscript, RM and DGM-C  
531 obtained funding for the research.

532

## 533 **CONFLICT OF INTEREST**

534 The authors declare no conflicts of interest.

535

## 536 **FUNDING**

537 This work was supported by funding from the National Science Foundation (IOS-2110017, IOS-  
538 1353886, MCB-1936590, IOS-1932639), the Bond Life Sciences Early Concept Grant, and the  
539 Interdisciplinary Plant Group, and University of Missouri.

540

## 541 **DATA AVAILABILITY**

542 The data supporting the findings of this study are available from the corresponding author, Ron  
543 Mittler, upon request. Proteomics data is deposited in the MASSIVE database ([massive.ucsd.edu](https://massive.ucsd.edu))  
544 with identifier PXD033795.

545 Reviewers can access via MSV000089456\_reviewer with password SaraAtNEET51022.

546

547

548

## REFERENCES

- Aoyama T, Chua NH.** 1997. A glucocorticoid-mediated transcriptional induction system in transgenic plants. *Plant Journal* **11**, 605–612.
- Balk J, Pilon M.** 2011. Ancient and essential: the assembly of iron-sulfur clusters in plants. *Trends in Plant Science* **16**, 218–226.
- Balsera M, Buchanan BB.** 2019. Evolution of the thioredoxin system as a step enabling adaptation to oxidative stress. *Free Radical Biology & Medicine* **140**, 28–35.
- Braymer JJ, Freibert SA, Rakwalska-Bange M, Lill R.** 2021. Mechanistic concepts of iron-sulfur protein biogenesis in Biology. *Biochimica et Biophysica Acta (BBA) - Molecular Cell Research* **1868**, 118863.
- Cejudo FJ, González MC, Pérez-Ruiz JM.** 2021. Redox regulation of chloroplast metabolism. *Plant Physiology* **186**, 9–21.
- Conte SS, Chu HH, Chan-Rodriguez D, Punshon T, Vasques KA, Salt DE, Walker EL.** 2013. *Arabidopsis thaliana* Yellow Stripe1-Like4 and Yellow Stripe1-Like6 localize to internal cellular membranes and are involved in metal ion homeostasis. *Frontiers in Plant Science* **4**, 283.
- Dahal D, Newton KJ, Mooney BP.** 2016. Quantitative proteomics of *Zea mays* hybrids exhibiting different levels of heterosis. *Journal of Proteome Research* **15**, 2445–2454.
- Darash-Yahana M, Pozniak Y, Lu M, et al.** 2016. Breast cancer tumorigenicity is dependent on high expression levels of NAF-1 and the lability of its Fe-S clusters. *Proceedings of the National Academy of Sciences of the United States of America* **113**, 10890–10895.
- Davletova S, Rizhsky L, Liang H, Shengqiang Z, Oliver DJ, Coutu J, Shulaev V, Schlauch K, Mittler R.** 2005a. Cytosolic ascorbate peroxidase 1 is a central component of the reactive oxygen gene network of *Arabidopsis*. *The Plant Cell* **17**, 268–281.
- Davletova S, Schlauch K, Coutu J, Mittler R.** 2005b. The zinc-finger Protein Zat12 plays a central role in reactive oxygen and abiotic stress signaling in *Arabidopsis*. *Plant Physiology* **139**, 847–856.
- Distéfano AM, López GA, Setzes N, Marchetti F, Cainzos M, Cascallares M, Zabaleta E,**

**Pagnussat GC.** 2021. Ferroptosis in plants: triggers, proposed mechanisms, and the role of iron in modulating cell death. *Journal of Experimental Botany* **72**, 2125–2135.

**Divol F, Couch D, Conéjéro G, Roschzttardtz H, Mari S, Curie C.** 2013. The Arabidopsis YELLOW STRIPE LIKE4 and 6 Transporters Control Iron Release from the Chloroplast. *The Plant Cell* **25**, 1040–1055.

**Duy D, Stube R, Wanner G, Philippar K.** 2011. The chloroplast permease PIC1 regulates plant growth and development by directing homeostasis and transport of iron. *Plant Physiology* **155**, 1709–1722.

**Duy D, Wanner G, Meda AR, Von Wirén N, Soll J, Philippar K.** 2007. PIC1, an Ancient Permease in Arabidopsis Chloroplasts, Mediates Iron Transport. *The Plant Cell* **19**, 986–1006.

**Foyer CH, Baker A, Wright M, Sparkes IA, Mhamdi A, Schippers JHM, Van Breusegem F.** 2020. On the move: Redox-dependent protein relocation in plants. *Journal of Experimental Botany* **71**, 620–631.

**Inupakutika MA, Sengupta S, Nechushtai R, Jennings PA, Onuchic JN, Azad RK, Padilla P, Mittler R.** 2017. Phylogenetic analysis of eukaryotic NEET proteins uncovers a link between a key gene duplication event and the evolution of vertebrates. *Scientific Reports* **7**, 42571.

**Jiang X, Stockwell BR, Conrad M.** 2021. Ferroptosis: mechanisms, biology and role in disease. *Nature reviews. Molecular Cell Biology* **22**, 266–282.

**Kang Z, Qin T, Zhao Z.** 2019. Thioredoxins and thioredoxin reductase in chloroplasts: A review. *Gene* **706**, 32–42.

**Karmi O, Holt SH, Song L, et al.** 2017. Interactions between mitoNEET and NAF-1 in cells. *Plos One* **12**, e0175796.

**Karmi O, Marjault HB, Bai F, et al.** 2022. A VDAC1-mediated NEET protein chain transfers [2Fe-2S] clusters between the mitochondria and the cytosol and impacts mitochondrial dynamics. *Proceedings of the National Academy of Sciences of the United States of America* **119**, e2121491119.

**Karmi O, Sohn YS, Zandalinas SI, Rowland L, King SD, Nechushtai R, Mittler R.** 2021.

Disrupting CISD2 function in cancer cells primarily impacts mitochondrial labile iron levels and triggers TXNIP expression. *Free Radical Biology and Medicine* **176**, 92–104.

**Landry AP, Cheng Z, Ding H.** 2015. Reduction of mitochondrial protein mitoNEET [2Fe-2S] clusters by human glutathione reductase. *Free Radical Biology & Medicine* **81**, 119–127.

**Landry AP, Ding H.** 2014. Redox Control of Human Mitochondrial Outer Membrane Protein MitoNEET [2Fe-2S] Clusters by Biological Thiols and Hydrogen Peroxide. *The Journal of Biological Chemistry* **289**, 4307–4315.

**Li X, Wang Y, Tan G, Lyu J, Ding H.** 2018. Electron transfer kinetics of the mitochondrial outer membrane protein mitoNEET. *Free Radical Biology & Medicine* **121**, 98–104.

**Lipper CH, Paddock ML, Onuchic JN, Mittler R, Nechushtai R, Jennings PA.** 2015. Cancer-related NEET proteins transfer 2Fe-2S clusters to anamorsin, a protein required for cytosolic iron-sulfur cluster biogenesis. *Plos One* **10**, e0139699.

**Maiorino M, Bosello-Travain V, Cozza G, Miotto G, Roveri A, Toppo S, Zaccarin M, Ursini F.** 2015. Understanding mammalian glutathione peroxidase 7 in the light of its homologs. *Free Radical Biology & Medicine* **83**, 352–360.

**Meyer AJ, Dreyer A, Ugalde JM, Feitosa-Araujo E, Dietz KJ, Schwarzländer M.** 2020. Shifting paradigms and novel players in Cys-based redox regulation and ROS signaling in plants - And where to go next. *Biological Chemistry* **402**, 399–423.

**Mittler R, Darash-Yahana M, Sohn YS, Bai F, Song L, Cabantchik IZ, Jennings PA, Onuchic JN, Nechushtai R.** 2019. NEET proteins: a new link between iron metabolism, reactive oxygen species, and cancer. *Antioxidants & Redox Signaling* **30**, 1083–1095.

**Nechushtai R, Conlan AR, Harir Y, et al.** 2012. Characterization of Arabidopsis NEET reveals an ancient role for NEET proteins in iron metabolism. *The Plant Cell* **24**, 2139–2154.

**Nechushtai R, Karmi O, Zuo K, Marjault HB, Darash-Yahana M, Sohn YS, King SD, Zandalinas SI, Carloni P, Mittler R.** 2020. The balancing act of NEET proteins: Iron, ROS, calcium and metabolism. *Biochimica et Biophysica Acta - Molecular Cell Research* **1867**.

**Ojeda V, Jiménez-López J, Romero-Campero FJ, Cejudo FJ, Pérez-Ruiz JM.** 2021. A

chloroplast redox relay adapts plastid metabolism to light and affects cytosolic protein quality control. *Plant Physiology* **187**, 88–102.

**Sengupta S, Nechushtai R, Jennings PA, Onuchic JN, Padilla PA, Azad RK, Mittler R.** 2018. Phylogenetic analysis of the CDGSH iron-sulfur binding domain reveals its ancient origin. *Scientific Reports* **8**, 4840.

**Sohn Y-S, Tamir S, Song L, et al.** 2013. NAF-1 and mitoNEET are central to human breast cancer proliferation by maintaining mitochondrial homeostasis and promoting tumor growth. *Proceedings of the National Academy of Sciences of the United States of America* **110**, 14676–14681.

**Tasnim H, Landry AP, Fontenot CR, Ding H.** 2020. Exploring the FMN binding site in the mitochondrial outer membrane protein mitoNEET. *Free Radical Biology & Medicine* **156**, 11–19.

**Willems P, Mhamdi A, Stael S, Storme V, Kerchev P, Noctor G, Gevaert K, Van Breusegem F.** 2016. The ROS wheel: Refining ROS transcriptional footprints. *Plant Physiology* **171**, 1720–1733.

**Zandalinas SI, Balfagón D, Arbona V, Gómez-Cadenas A, Inupakutika MA, Mittler R.** 2016. ABA is required for the accumulation of APX1 and MBF1c during a combination of water deficit and heat stress. *Journal of Experimental Botany* **67**, 5381–5390.

**Zandalinas SI, Fichman Y, Devireddy AR, Sengupta S, Azad RK, Mittler R.** 2020a. Systemic signaling during abiotic stress combination in plants. *Proceedings of the National Academy of Sciences of the United States of America* **117**, 13810–13820.

**Zandalinas SI, Song L, Sengupta S, et al.** 2020b. Expression of a dominant-negative AtNEET-H89C protein disrupts iron–sulfur metabolism and iron homeostasis in Arabidopsis. *The Plant Journal* **101**, 1152–1169.

**Zhang X, Henriques R, Lin SS, Niu QW, Chua NH.** 2006. Agrobacterium-mediated transformation of Arabidopsis thaliana using the floral dip method. *Nature Protocols* **1**, 641–646.

**Zhang Y, Lyver ER, Nakamaru-Ogiso E, et al.** 2008. Dre2, a conserved eukaryotic Fe/S cluster protein, functions in cytosolic Fe/S protein biogenesis. *Molecular and Cellular Biology* **28**, 5569–5582.

**Zuris JA, Harir Y, Conlan AR, *et al.*** 2011. Facile transfer of [2Fe-2S] clusters from the diabetes drug target mitoNEET to an apo-acceptor protein. *Proceedings of the National Academy of Sciences of the United States of America* **108**, 13047–13052.



## FIGURE LEGENDS

**Fig. 1.** The experimental system used to study the function of AtNEET in Arabidopsis. (A) Outline of the time-course design. Triangular arrows at the top indicate the application of DEX to plants (Col, AtNEET and H89C), and black arrows on bottom indicate the sampling times of all plants for analysis. Yellow box indicates the light stress treatment that was applied on day 2. Please see text for more information. (B) Steady-state transcript expression levels of AtNEET in Col and homozygous AtNEET and H89C plants following 4 doses of DEX application. Stars indicate the plants chosen for further analysis. (C) Representative images of mock and DEX treated Col, AtNEET, and H89C plants on day 14 are shown alongside ion leakage from leaves of the selected lines, also measured on day 14. All experiments were repeated at least three times with similar results. Asterisks denote statistical significance with respect to control (Col) at  $P < 0.05$  (Student t-test, SD,  $N=5$ ). Abbreviations used: DEX, dexamethasone; EL, electrolyte leakage; HL, high light.

**Fig. 2.** Physiological characterization of Col, AtNEET and H89C plants at the different time points of the experiment. (A) Steady-state transcript expression levels of AtNEET in Col, AtNEET, and H89C plants at the different time points. (B) and (C) Quantum yield of PSII (B) and chlorophyll content (C) measured at the different time points for the different lines. All experiments were repeated at least three times with similar results. Asterisks denote statistical significance with respect to control (0 h) at  $P < 0.05$  (Student t-test, SD,  $N=5$ ). Abbreviations used: Chl, chlorophyll; PSII, photosystem II.

**Fig. 3.** Proteomics analysis and expression measurements of selected transcripts at the different time points. (A) Principal component analysis (PCA) of the proteomics results obtained for the different lines at the different time points of the experiment. (B) Expression level of AtNEET in Col, AtNEET and H89C plants at the different time points. (C) Steady-state transcript expression levels of APX1 and Zat12 in Col, AtNEET, and H89C plants at the different time points. All experiments were repeated at least three times with similar results. Asterisks denote statistical significance with respect to control (Col) at  $P < 0.05$  (Student t-test, SD,  $N=5$ ). Abbreviations used: APX1, ascorbate peroxidase 1; n.s., not significant; PC, principal component; Zat12, zinc finger protein ZAT12.

**Fig. 4.** Comparison between the proteomics results obtained with the inducible expression system in this study and the results obtained with constitutive expression of AtNEET and H89C. (A) Heat maps for the expression pattern of proteins shared between the two experimental systems. (B) Venn diagrams showing the overlap between the two experimental systems (inducible expression in mature plants *vs* constitutive expression in seedlings). Proteomics results of constitutive AtNEET and H89C expression were obtained from Zandalinas et al., 2020b. All experiments were repeated at least three times with similar results.

**Fig. 5.** Changes in protein and transcript expression associated with iron-sulfur cluster assembly in the chloroplast and cytosol during the course of the experiment. (A) Pathway and heat maps for the expression pattern of different proteins with a significant change in expression (in at least one time point, compared to time 0 h within each genotype) belonging to the iron-sulfur cluster assembly of Arabidopsis at the different time points. (B) Steady-state transcript expression levels of CIA1 in Col, AtNEET, and H89C plants at the different time points. Yellow arrows highlight proteins of interest. All experiments were repeated at least three times with similar results. Asterisks denote statistical significance with respect to control (Col) at  $P < 0.05$  (Student t-test, SD, N=5). Abbreviations used: AE7, AS1/2 Enhancer 7; Apo, apo-protein; Chl, chloroplast; CIA1, Cytosolic Iron-Sulfur Protein Assembly 1; Cyt, cytosol; DRE2, Homolog of Yeast DRE2; e, electron; GRXS14, Glutaredoxin S14; GRXS16, Glutaredoxin S16; HCF101, High-Chlorophyll-Fluorescence 101; Holo, holo-protein; MET18, Homolog of Yeast MET18; NAR1, Homolog of Yeast NAR1; NBP35, Nucleotide Binding Protein 35; NFS2, Nifs-Like Cysteine Desulfurase 2; n.s., not significant; SufA1, Sulfur A1; SufB, Sulfur B; SufC, Sulfur C; SufD, Sulfur D; SufE, Sulfur E; TAH18, diflavin reductase.

**Fig. 6.** Changes in protein expression levels associated with iron/metal transport during the course of the experiment. Pathway and heat maps for the expression pattern of different proteins with a significant change in expression (in at least one time point, compared to time 0 h within each genotype) associated with the transport of iron and other metals into and out of the chloroplast and vacuole are shown. Yellow arrows highlight proteins of interest. All experiments were repeated at least three times with similar results. Abbreviations used: Chl, chloroplast; FRO7, Ferric Reduction Oxidase 7; Mfl1, Mitoferrin-like 1; NRAMP4, Natural Resistance Associated

Macrophage Protein 4; n.s., not significant; PIC1, Permease In Chloroplasts 1; Vac, vacuole; YSL6, Yellow Stripe Like 6.

**Fig. 7.** Changes in protein and transcript expression associated with the ferredoxin (Fd), Fd-thioredoxin (TRX) reductase (FTR) and/or TRX during the course of the experiment. (A) Pathway and heat maps for the expression pattern of different proteins with a significant change in expression (in at least one time point, compared to time 0 h within each genotype) associated with the Fd-FTR-TRX network of Arabidopsis at the different time points. (B) Steady-state transcript expression levels of an 2Fe-2S Fd-like, FdC1 and a TRX protein in Col, AtNEET, and H89C plants at the different time points. Yellow arrows highlight proteins of interest. All experiments were repeated at least three times with similar results. Asterisks denote statistical significance with respect to control (Col) at  $P < 0.05$  (Student t-test, SD, N=5). Abbreviations used: Fd, ferredoxin; FTR, ferredoxin-thioredoxin reductase; FTRA1, Ferredoxin/thioredoxin reductase subunit A1; FTRA2, Ferredoxin/thioredoxin reductase subunit A2; n.s., not significant; TRX, thioredoxin; TPX, thioredoxin-dependent peroxidase.

**Fig. 8.** Changes in protein expression associated with reactive oxygen species (ROS) scavenging during the course of the experiment. Pathway and heat maps for the expression of different proteins with a significant change in expression (in at least one time point, compared to time 0 h within each genotype) associated with ROS scavenging in Arabidopsis at the different time points are shown. Yellow arrows highlight proteins of interest. All experiments were repeated at least three times with similar results. Abbreviations used: APX, ascorbate peroxidase; ASC, ascorbate; DHA, dehydroascorbate; DHAR, dehydroascorbate reductase; GPX, glutathione peroxidases; GR, glutathione reductase; GSH, glutathione; GSH1, glutamate-cysteine ligase 1; GSH2, glutathione synthase 2; GSSG, oxidized glutathione; MDA, monodehydroascorbate; MDAR, monodehydroascorbate reductase; n.s., not significant; PRX; peroxiredoxin; TRX, thioredoxin.

**Fig. 9.** A simplified model for the dual role of AtNEET in plants. By providing 2Fe-2S clusters to ferredoxins, AtNEET is shown to support the function of the ferredoxin (Fd), Fd-thioredoxin (TRX) reductase (FTR), and TRX network of Arabidopsis (top). In addition, AtNEET is shown to play a key role in the mobilization of 2Fe-2S clusters from within the chloroplast to the cytosol and this function is shown to be important for regulating the level of different Fe-S cluster-containing proteins as well as the iron deficiency response of Arabidopsis. Functioning as a

dominant-negative inhibitor of AtNEET iron cluster transfer functions, H89C is shown to block these two pathways. The model shown was developed based on the results obtained in the current study and the results presented in Zandalinas et al., 2020*b*. Abbreviations used: CIA1, Cytosolic Iron-Sulfur Protein Assembly 1; DRE2, Homolog of Yeast DRE2; Fd, ferredoxin; FTR, ferredoxin-thioredoxin reductase; GPX, glutathione peroxidase; PIC1, Permease In Chloroplasts 1; PSI, photosystem I; PSII, photosystem II; TRX, thioredoxin; YSL6, Yellow Stripe Like 6.

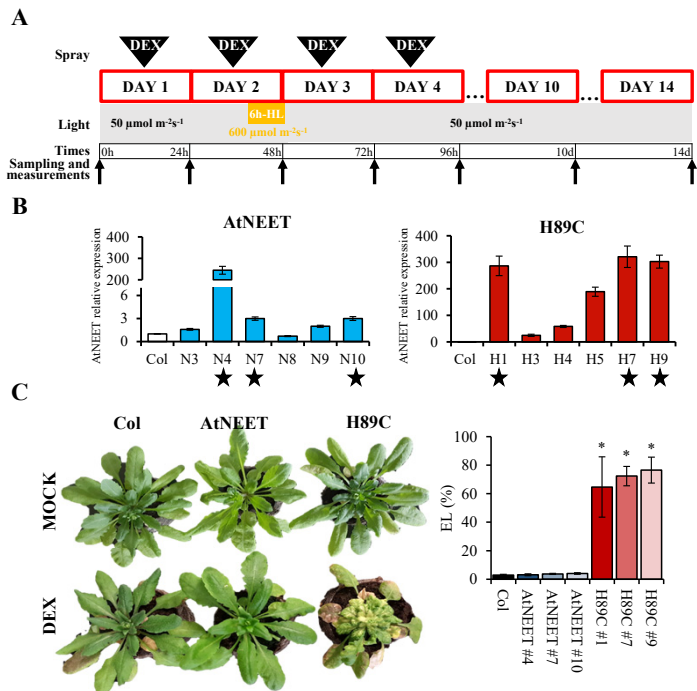

**Fig. 1.** The experimental system used to study the function of AtNEET in Arabidopsis. (A) Outline of the time-course design. Triangular arrows at the top indicate the application of DEX to plants (Col, AtNEET and H89C), and black arrows on bottom indicate the sampling times of all plants for analysis. Yellow box indicates the light stress treatment that was applied on day 2. Please see text for more information. (B) Steady-state transcript expression levels of AtNEET in Col and homozygous AtNEET and H89C plants following 4 doses of DEX application. Stars indicate the plants chosen for further analysis. (C) Representative images of mock and DEX treated Col, AtNEET, and H89C plants on day 14 are shown alongside ion leakage from leaves of the selected lines, also measured on day 14. All experiments were repeated at least three times with similar results. Asterisks denote statistical significance with respect to control (Col) at  $P < 0.05$  (Student t-test, SD,  $N=5$ ). Abbreviations used: DEX, dexamethasone; EL, electrolyte leakage; HL, high light.

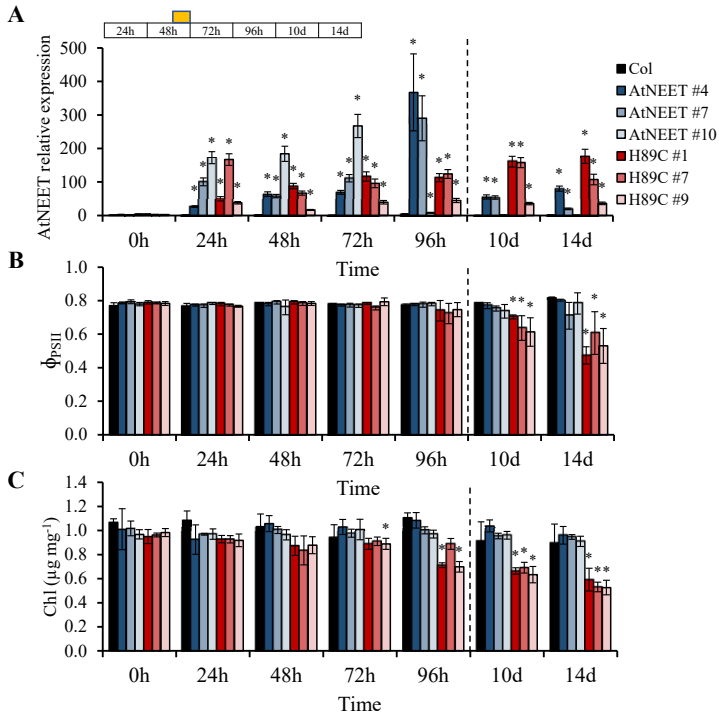

**Fig. 2.** Physiological characterization of Col, AtNEET and H89C plants at the different time points of the experiment. (A) Steady-state transcript expression levels of AtNEET in Col, AtNEET, and H89C plants at the different time points. (B) and (C) Quantum yield of PSII (B) and chlorophyll content (C) measured at the different time points for the different lines. All experiments were repeated at least three times with similar results. Asterisks denote statistical significance with respect to control (0 h) at  $P < 0.05$  (Student t-test, SD,  $N=5$ ). Abbreviations used: Chl, chlorophyll; PSII, photosystem II.

**A**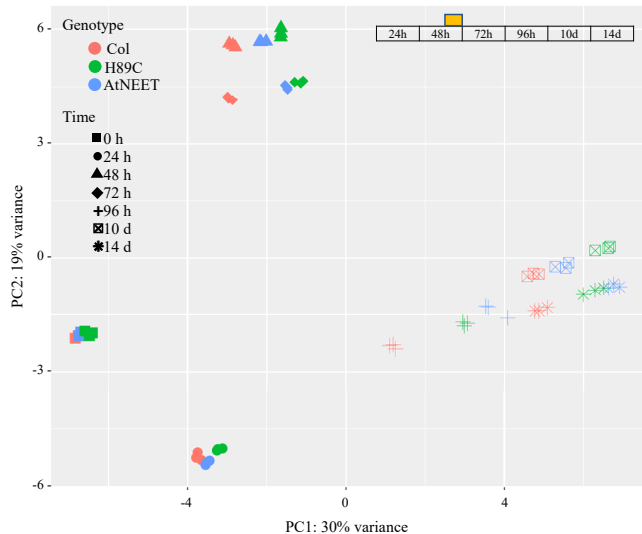**B**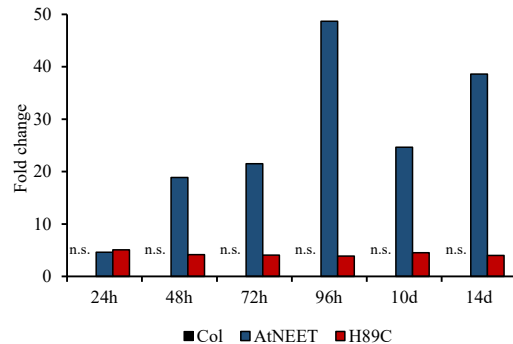**C**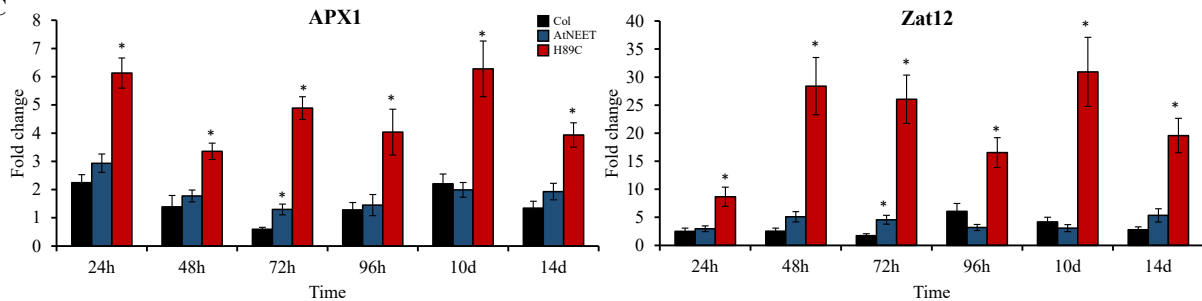

**Fig. 3.** Proteomics analysis and expression measurements of selected transcripts at the different time points. (A) Principal component analysis (PCA) of the proteomics results obtained for the different lines at the different time points of the experiment. (B) Expression level of AtNEET in Col, AtNEET and H89C plants at the different time points. (C) Steady-state transcript expression levels of APX1 and Zat12 in Col, AtNEET, and H89C plants at the different time points. All experiments were repeated at least three times with similar results. Asterisks denote statistical significance with respect to control (Col) at  $P < 0.05$  (Student t-test, SD,  $N=5$ ). Abbreviations used: APX1, ascorbate peroxidase 1; n.s., not significant; PC, principal component; Zat12, zinc finger ZAT12.

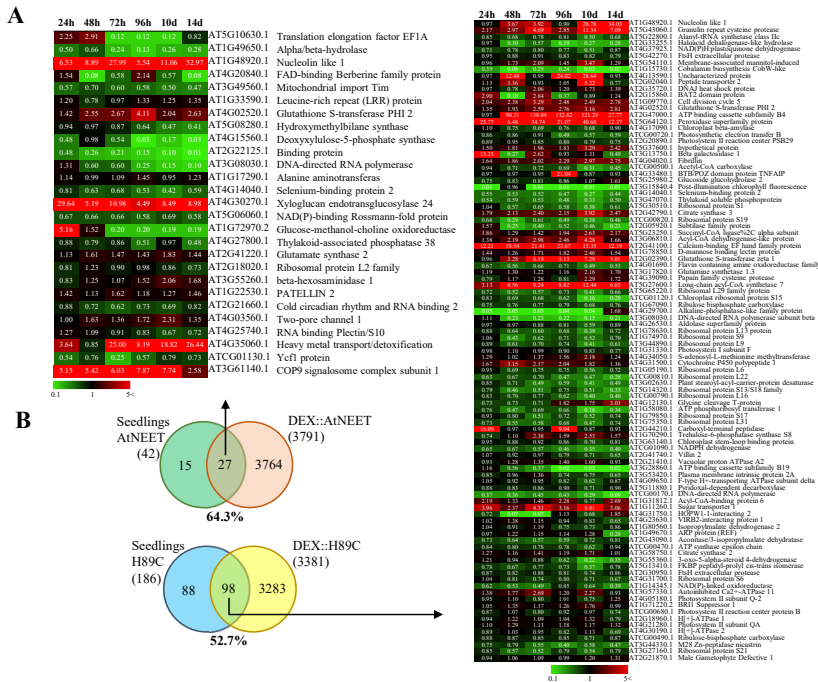

**Fig. 4.** Comparison between the proteomics results obtained with the inducible expression system and the results obtained with constitutive expression of AtNEET and H89C. (A) Heat maps for the expression pattern of proteins shared between the two experimental systems. (B) Venn diagrams showing the overlap between the two experimental systems (inducible expression in mature plants vs constitutive expression in seedlings). Proteomics results of constitutive AtNEET and H89C expression were obtained from Zandalinas et al., 2020b. All experiments were repeated at least three times with similar results.



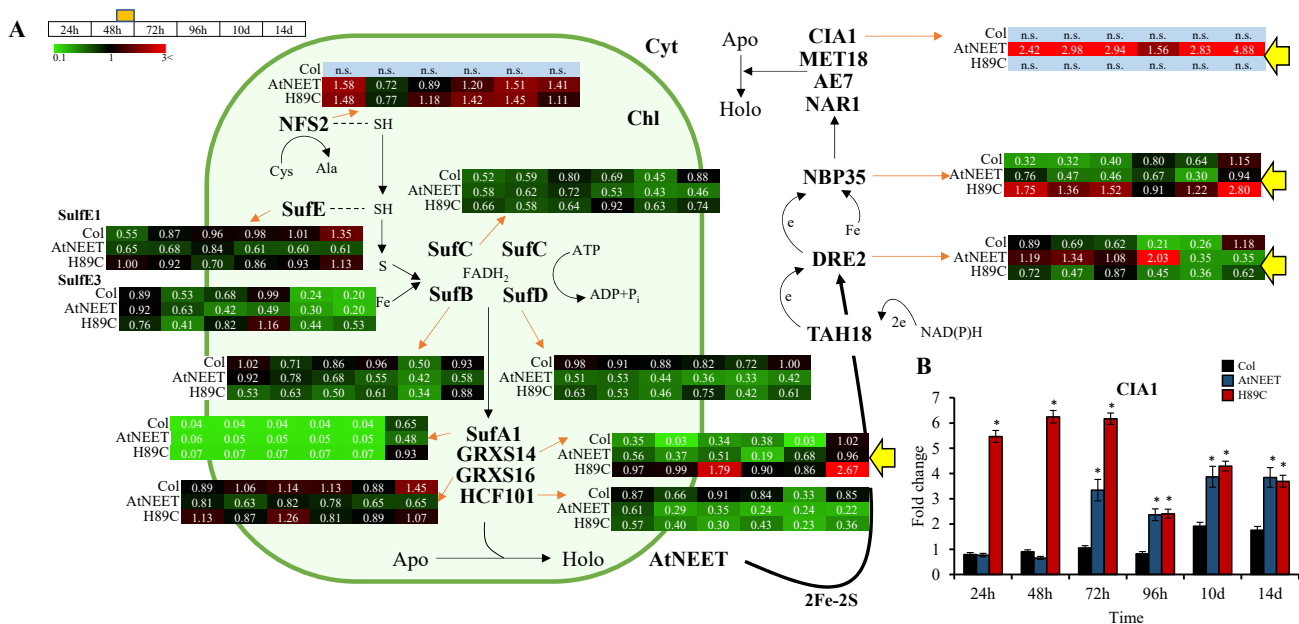

**Fig. 5.** Changes in protein and transcript expression associated with iron-sulfur cluster assembly in the chloroplast and cytosol during the course of the experiment. (A) Pathway and heat maps for the expression pattern of different proteins with a significant change in expression (in at least one time point, compared to time 0 h within each genotype) belonging to the iron-sulfur cluster assembly of Arabidopsis at the different time points. (B) Steady-state transcript expression levels of CIA1 in Col, AtNEET, and H89C plants at the different time points. Yellow arrows highlight proteins of interest. All experiments were repeated at least three times with similar results. Asterisks denote statistical significance with respect to control (Col) at  $P < 0.05$  (Student t-test, SD,  $N=5$ ). Abbreviations used: AE7, ASI/2 Enhancer 7; Apo, apo-protein; Chl, chloroplast; CIA1, Cytosolic Iron-Sulfur Protein Assembly 1; Cyt, cytosol; DRE2, Homolog of Yeast DRE2; e, electron; GRXS14, Glutaredoxin S14; GRXS16, Glutaredoxin S16; HCF101, High-Chlorophyll-Fluorescence 101; Holo, holo-protein; MET18, MET18, Homolog of Yeast MET18; NAR1, Homolog of Yeast NAR1; NBP35, Nucleotide Binding Protein 35; NFS2, Nifs-Like Cysteine Desulfurase 2; n.s., not significant; SufA1, Sulfur A1; SufB, Sulfur B; SufC, Sulfur C; SufD, Sulfur D; SufE, Sulfur E; TAH18, diflavin reductase.

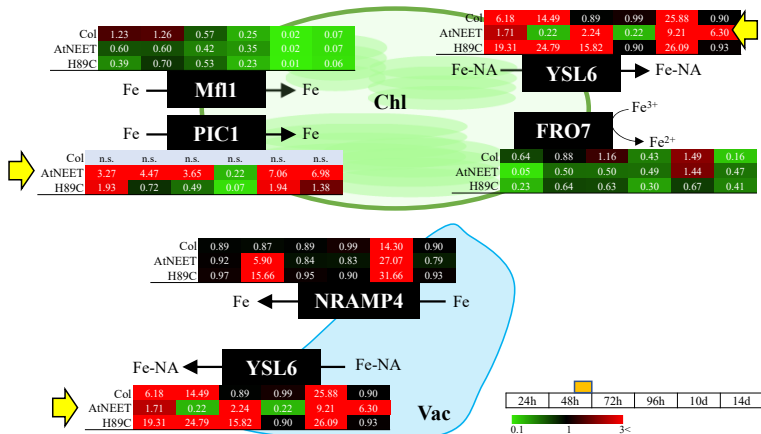

**Fig. 6.** Changes in protein expression levels associated with iron/metal transport during the course of the experiment. Pathway and heat maps for the expression pattern of different proteins with a significant change in expression (in at least one time point, compared to time 0 h within each genotype) associated with the transport of iron and other metals into and out of the chloroplast and vacuole are shown. Yellow arrows highlight proteins of interest. All experiments were repeated at least three times with similar results. Abbreviations used: Chl, chloroplast; FRO7, Ferric Reduction Oxidase 7; Mf11, Mitoferrin-like 1; NRAMP4, Natural Resistance Associated Macrophage Protein 4; n.s., not significant; PIC1, Permease In Chloroplasts 1; Vac, vacuole; YSL6, Yellow Stripe Like 6.

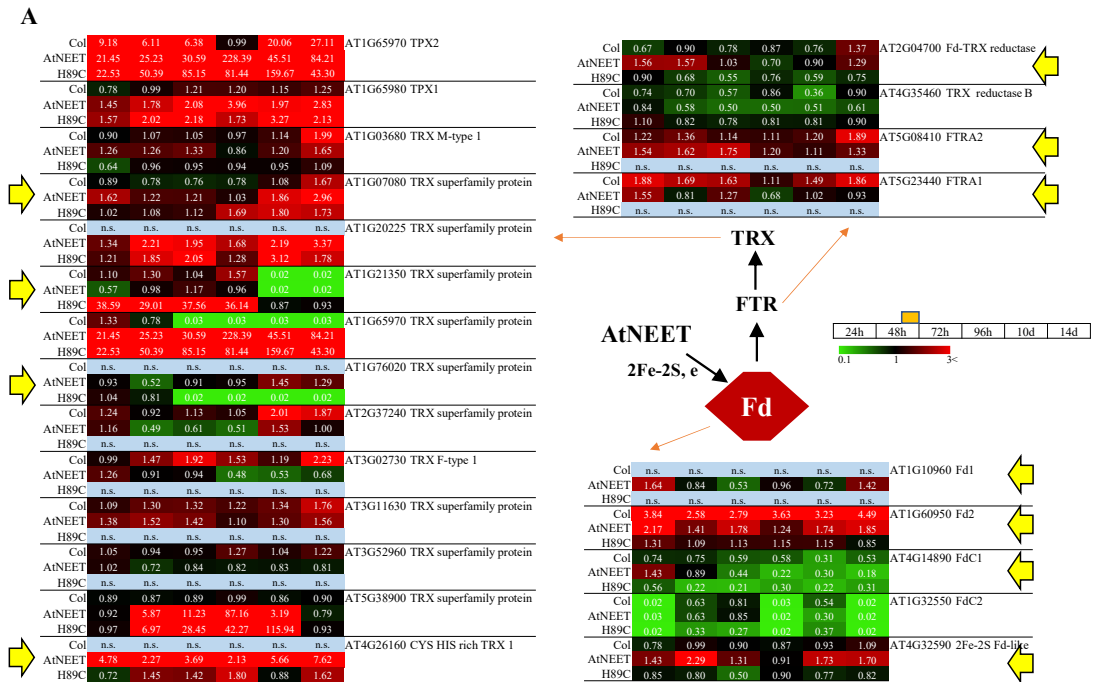

**Fig. 7.** Changes in protein and transcript expression associated with the ferredoxin (Fd), Fd-thioredoxin (TRX) reductase (FTR) and/or TRX during the course of the experiment. (A) Pathway and heat maps for the expression pattern of different proteins with a significant change in expression (in at least one time point, compared to time 0 h within each genotype) associated with the Fd-FTR-TRX network of Arabidopsis at the different time points. (B) Steady-state transcript expression levels of an 2Fe-2S Fd-like, FdC1 and a TRX protein in Col, AtNEET, and H89C plants at the different time points. Yellow arrows highlight proteins of interest. All experiments were repeated at least three times with similar results. Asterisks denote statistical significance with respect to control (Col) at  $P < 0.05$  (Student's *t*-test, SD,  $N=5$ ). Abbreviations used: Fd, ferredoxin; FTR, ferredoxin-thioredoxin reductase; FTRA1, Ferredoxin/thioredoxin reductase subunit A1; FTRA2, Ferredoxin/thioredoxin reductase subunit A2; n.s., not significant; TRX, thioredoxin; TPX, thioredoxin-dependent peroxidase.

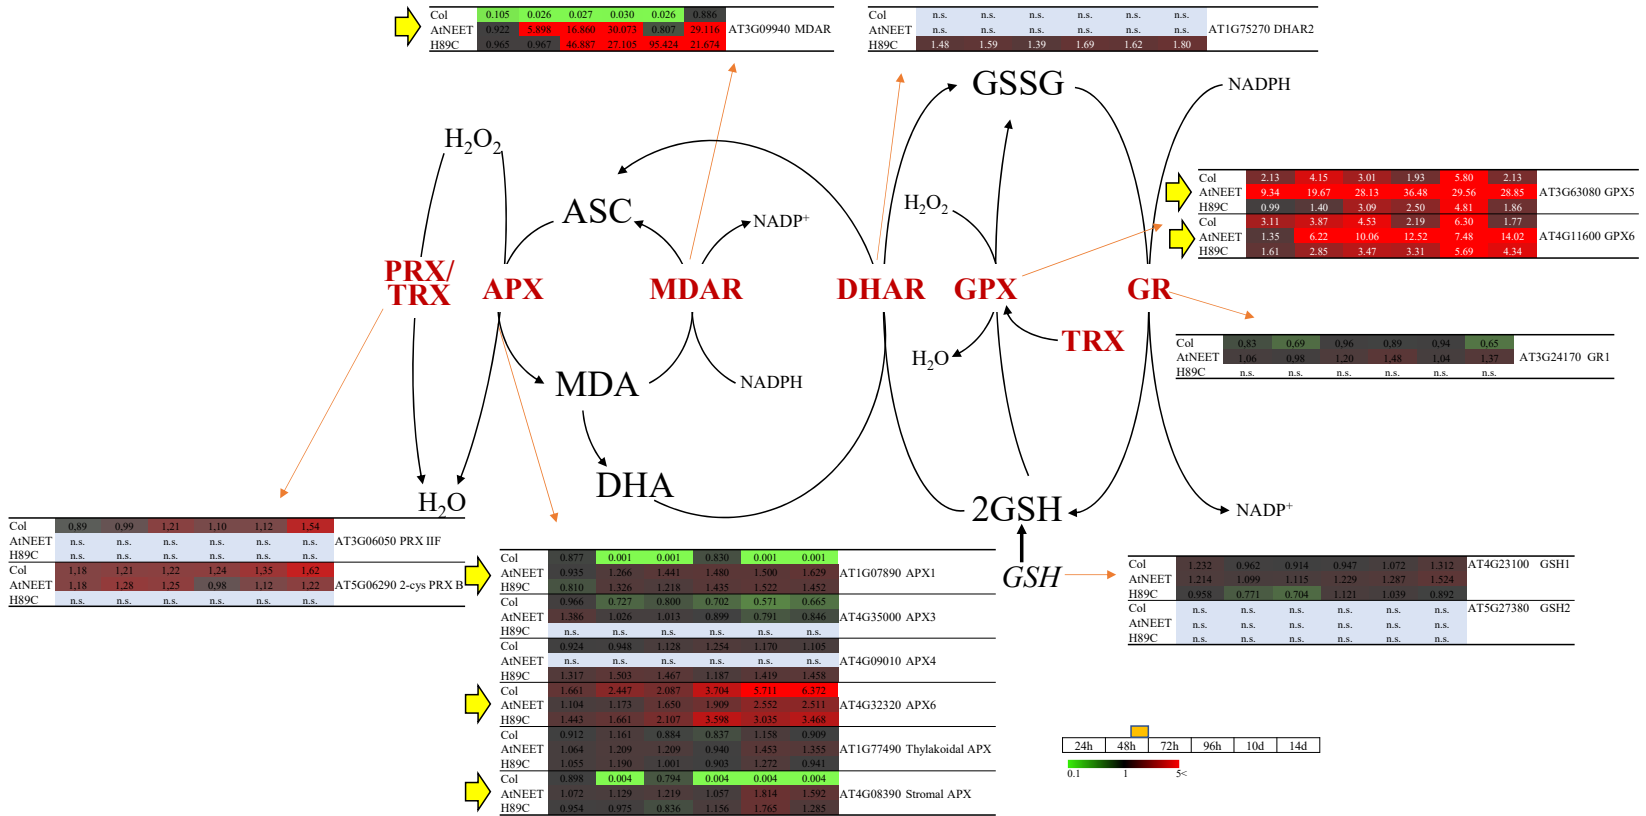

**Fig. 8.** Changes in protein expression associated with reactive oxygen species (ROS) scavenging during the course of the experiment. Pathway and heat maps for the expression of different proteins with a significant change in expression (in at least one time point, compared to time 0 h within each genotype) associated with ROS scavenging in Arabidopsis at the different time points are shown. Yellow arrows highlight proteins of interest. All experiments were repeated at least three times with similar results. Abbreviations used: APX, ascorbate peroxidase; ASC, ascorbate; DHA, dehydroascorbate; DHAR, dehydroascorbate reductase; GPX, glutathione peroxidases; GR, glutathione reductase; GSH, glutathione; GSH1, glutamate-cysteine ligase 1; GSH2, glutathione synthase 2; GSSG, oxidized glutathione; MDA, monodehydroascorbate; MDAR, monodehydroascorbate reductase; n.s., not significant; PRX; peroxidoxin; TRX, thioredoxin.

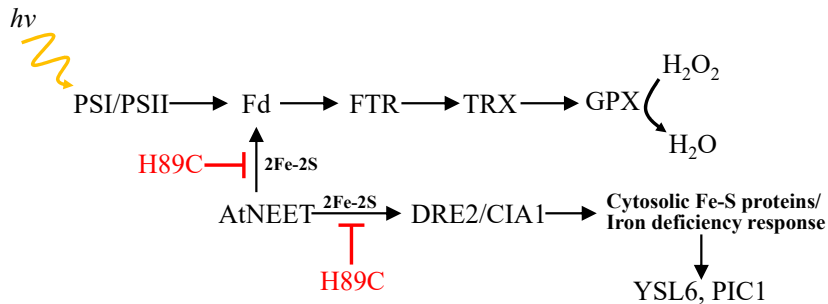

**Fig. 9.** A simplified model for the dual role of AtNEET in plants. By providing 2Fe-2S clusters to ferredoxins, AtNEET is shown to support the function of the ferredoxin (Fd), Fd-thioredoxin (TRX) reductase (FTR), and TRX network of Arabidopsis (top). In addition, AtNEET is shown to play a key role in the mobilization of 2Fe-2S clusters from within the chloroplast to the cytosol and this function is shown to be important for regulating the level of different Fe-S cluster-containing proteins as well as the iron deficiency response of Arabidopsis. Functioning as a dominant-negative inhibitor of AtNEET iron cluster transfer functions, H89C is shown to block these two pathways. The model shown was developed based on the results obtained in the current study and the results presented in Zandalinas et al., 2020b. Abbreviations used: CIA1, Cytosolic Iron-Sulfur Protein Assembly 1; DRE2, Homolog of Yeast DRE2; Fd, ferredoxin; FTR, ferredoxin-thioredoxin reductase; GPX, glutathione peroxidase; PIC1, Permease in Chloroplasts 1; PSI, photosystem I; PSII, photosystem II; TRX, thioredoxin; YSL6, Yellow Stripe Like 6.

# pTA7002

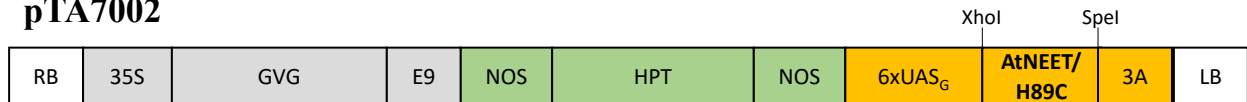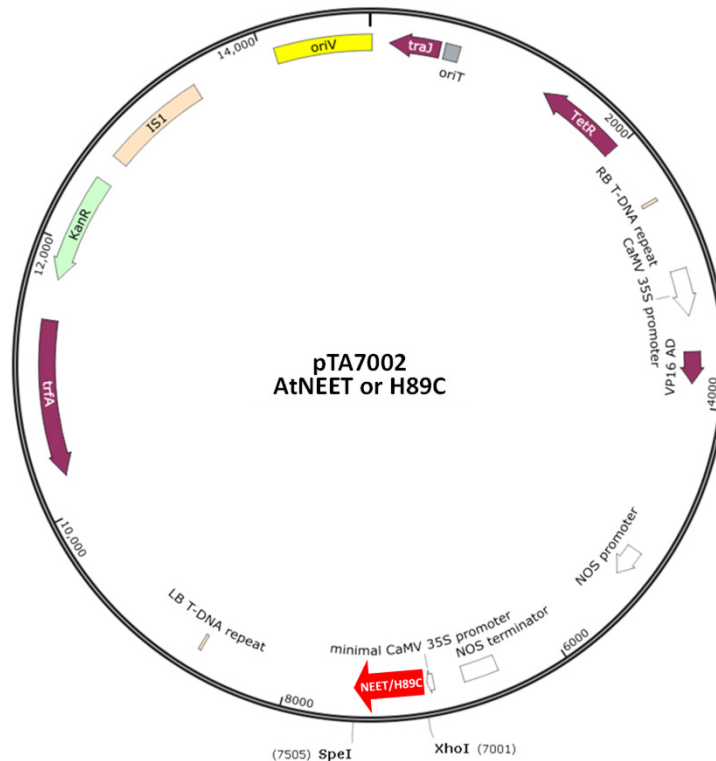

**Supplementary Fig. S1.** The dexamethasone (DEX)-inducible system to drive the expression of AtNEET, or its mutated dominant-negative copy H89C, in mature transgenic Arabidopsis plants. AtNEET or H89C were amplified and cloned into pTA7002 vector (Aoyama and Chua, 1997) using XhoI and SpeI sites. Abbreviations used: RB, right border; 35S, cauliflower mosaic virus 35S promoter; E9, the poly(A) addition sequence of the pea ribulose biphosphate carboxylase small subunit rbcS-E9; GVG, chimeric transcription factor GVG composed by the heterologous DNA-binding of the yeast transcription factor GAL4, the transactivating domains from the herpes viral protein VP16, and the glucocorticoid receptor (GR); NOS, nopaline synthase promoter and terminator; HPT, hygromycin phosphotransferase; 6xUAS<sub>G</sub>, six copies of the GAL4 UAS; 3A, the poly(A) addition sequence of the pea rbcS-3A; LB, left border.

## TRXs

|        | Line 1 | Line 2 |                                                 |
|--------|--------|--------|-------------------------------------------------|
| AtNEET | 0,90   | 0,75   | AT1G03680 TRX M-type 1                          |
| H89C   | n.s.   | n.s.   |                                                 |
| AtNEET | 0,86   | 0,75   | AT1G21350 TRX superfamily protein               |
| H89C   | n.s.   | n.s.   |                                                 |
| AtNEET | n.s.   | n.s.   | AT1G65970 TPX2                                  |
| H89C   | 4,86   | 1,28   |                                                 |
| AtNEET | 0,77   | 0,76   | AT2G04700 Fd-TRX reductase catalytic beta chain |
| H89C   | n.s.   | n.s.   |                                                 |
| AtNEET | 0,75   | 0,67   | AT3G02730 TRX F-type 1                          |
| H89C   | 0,75   | 0,81   |                                                 |
| AtNEET | n.s.   | n.s.   | AT3G11630 TRX superfamily protein               |
| H89C   | 1,12   | 1,10   |                                                 |
| AtNEET | n.s.   | n.s.   | AT1G65980 TPX1                                  |
| H89C   | 2,51   | 1,16   |                                                 |
| AtNEET | n.s.   | n.s.   | AT1G76020 TRX superfamily protein               |
| H89C   | 0,51   | 0,76   |                                                 |

## APXs

|        | Line 1 | Line 2 |                       |
|--------|--------|--------|-----------------------|
| AtNEET | 0,82   | 0,86   | AT4G08390 Stromal APX |
| H89C   | 1,40   | n.s.   |                       |
| AtNEET | n.s.   | n.s.   | AT4G09010 APX4        |
| H89C   | 0,80   | 0,70   |                       |

## GPXs

|        | Line 1 | Line 2 |                |
|--------|--------|--------|----------------|
| AtNEET | 0,62   | 0,80   | AT4G11600 GPX6 |
| H89C   | 1,78   | n.s.   |                |

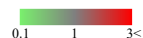

**Supplementary Fig. S2.** Changes in steady state expression of different transcripts involved in reactive oxygen species (ROS) scavenging reported previously (Zandalinas et al., 2020b) in two different lines with constitutive expression of AtNEET or H89C. Abbreviations used: APX, ascorbate peroxidase; GPX, glutathione peroxidase; n.s., not significant; TRX, thioredoxin.





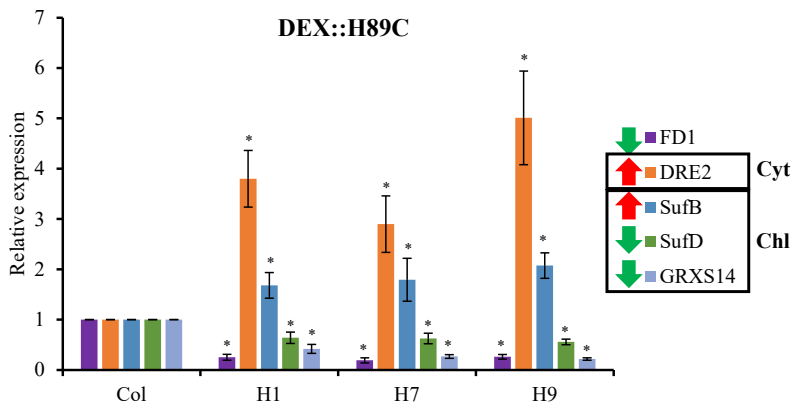

**Supplementary Fig. S4.** Changes in steady state expression of different transcript associated with iron-sulfur cluster assembly in the chloroplast and cytosol in three different homozygous H89C lines (H1, H7 and H9) following 4 doses of DEX application (Fig. 1A). All experiments were repeated at least three times with similar results. Asterisks denote statistical significance with respect to control (Col) at  $P < 0.05$  (Student t-test, SD,  $N=5$ ). Abbreviations used: Chl, chloroplast; Cyt, cytosol; DEX, dexamethasone; DRE2, Homolog of Yeast DRE2; FD1, ferredoxin1; GRXS14, Glutaredoxin S14; SufB, Sulfur B; SufD, Sulfur D.
